Laboratory-confirmed respiratory viral infection triggers for acute myocardial infarction and stroke: systematic review protocol

Short title: systematic review protocol of viral triggers for acute cardiovascular events

Tu Q Nguyen<sup>1,2\*</sup>, Diana Vlasenko<sup>2,3</sup>, Aishwarya N Shetty<sup>2,3</sup>, Christopher M Reid<sup>4,5</sup>, Hazel J Clothier<sup>1,2,3,6</sup>, Jim P Buttery<sup>1,2,3,7</sup>

<sup>1</sup> Department of Paediatrics, The University of Melbourne, Melbourne, Victoria, Australia

<sup>2</sup> Epi-Informatics, Murdoch Childrens Research Institute, Centre for Health Analytics, Melbourne Children's Campus, Melbourne, Victoria, Australia

<sup>3</sup> Epi-Informatics group and SAEFVIC, Murdoch Children's Research Institute, 50 Flemington Rd, Parkville, Victoria, Australia

<sup>4</sup> School of Population Health, Curtin University, Perth, Western Australia, Australia

<sup>5</sup> Centre for Cardiovascular Research and Education in Therapeutics, Monash University, Melbourne, Victoria, Australia

<sup>6</sup> School of Population and Global Health, The University of Melbourne, Melbourne, Victoria, Australia

<sup>7</sup> Department of Infectious Diseases, Royal Children's Hospital, Melbourne, Victoria, Australia

**NOTE: This preprint reports new research that has not been certified by peer review and should not be used to guide clinical practice.**

20 \* Corresponding author

21 Email: [tun1@student.unimelb.edu.au](mailto:tun1@student.unimelb.edu.au) (TQN)

## Abstract

## Background

Cardiovascular disease contributes substantially to global mortality and morbidity. Respiratory tract infections, particularly influenza, may trigger an increase in the short-term risk of acute myocardial infarction and stroke. Recent studies have also linked this risk to other respiratory viruses, including respiratory syncytial virus (RSV) and severe acute respiratory syndrome coronavirus 2 (SARS-CoV-2). However, the pathogen-specific relative contributions, the strength of their associations, and overall public health significance are poorly understood. Assuming causal links, understanding, quantifying, and comparing the effects of different pathogens as triggering factors for acute cardiovascular events is critical to guide future research and prevention. Our aim is to conduct a systematic review to examine the relative effects of laboratory-confirmed respiratory virus infections as triggers for acute myocardial infarction and stroke.

## Methods

We will conduct a comprehensive search of Ovid MEDLINE, PubMed, Ovid Embase, Cochrane Library Central Register of Controlled Trials, and Web of Science, from inception to the end of March 2024. We will include the following analytical epidemiological study types: randomised controlled trials, cohort and case-control studies, self-controlled case series, and case-crossover designs. We will not impose restrictions on the date, language, geographical region, or sample size, to minimise the risk of introducing biases. Search results will be screened for eligibility by two independent reviewers, and discrepancies resolved by

consensus and/or arbitration by a third reviewer. We will assess the risk of bias among the included studies by adopting the Cochrane Collaboration tools for randomised and non-randomised studies. The overall quality of studies will be assessed using the Grading of Recommendations, Assessment, Development and Evaluations (GRADE) approach. We will examine sources of heterogeneity, and if studies are sufficiently homogeneous, a meta-analysis will be conducted to calculate the pooled effect sizes. Reporting will adhere to the Preferred Reporting Items for Systematic Reviews and Meta-Analyses (PRISMA) guidelines.

## Registration

International Prospective Register of Systematic Reviews (PROSPERO) registration number: CRD42024494997

## Introduction

### Rationale

Cardiovascular disease (CVD), particularly acute myocardial infarction (AMI) and stroke, remains the world's leading contributor of disease burden and death.[1] Despite progress in age-standardised mortality rates, the prevalence and incidence of acute cardiovascular events is set to rise due to increasing urbanisation, population growth and ageing.[2] Well-established risk factors include air pollution, smoking, poor diet, hypertension, and physical inactivity,[3,4] which explain most but not all of the attributable cardiovascular disease burden. It is thought that precipitating factors such as mental stress, physical exertion, certain drugs and infections may 'trigger' susceptible individuals to experience AMI or stroke.[5] Gaining insight into the role of these factors is crucial for improved risk prediction and prevention.

Given the prevalence of infections, strong biological plausibility, and apparent reduction in acute cardiovascular outcomes observed in influenza vaccine randomised controlled trials,[6–8] the contribution to the burden of cardiovascular disease may be substantial. To date, reliable data are largely obtained from epidemiological studies focusing on individuals with influenza infection[9]; however, other small-scale studies have described the effects of various bacterial and viral infections on specific cardiovascular endpoints.[10–12] Infections involving the lower and upper respiratory tract are most frequently implicated as triggers for AMI and stroke; attributable respiratory viruses include influenza, respiratory syncytial virus (RSV),[10,11] cytomegalovirus (CMV),[12] and more recently, severe acute respiratory

syndrome coronavirus 2 (SARS-CoV-2).[13] Respiratory viruses can infiltrate the lungs through airway epithelial cells, directly stimulating the production of proinflammatory cytokines. The hypothesis is that this triggers systemic inflammation, inducing endothelium damage, atherosclerosis and plaque rupture,[14] increasing the risk of AMI and stroke.[15] The duration of the risk period following respiratory infection is typically brief, lasting from several days to a few months, and gradually diminishes with reduced viral load.[16,17]

Given the evidence of a protective relationship between influenza vaccine and cardiovascular disease risk,[18,19] high-quality observational studies of other viral precipitants could pave the way for future trials beyond influenza. However, the comparative pathogen-specific effects of respiratory viruses on the risk of AMI and stroke remain unclear. Modern diagnostic tests, such as increasingly available multiplex respiratory panels, enable the distinction between potentially attributable viruses. Previous systematic reviews and meta-analyses have focused solely on a single viral trigger like influenza or SARS-CoV-2,[20,21] or relied on broad definitions of infection (e.g. symptomatic respiratory tract infection or influenza-like illness),[22] making interpretation challenging as data were not pooled across studies detecting different attributable viruses.[23] In this systematic review, we aim to examine the evidence from studies of respiratory viruses identified by laboratory-confirmatory testing, compare the associations between viral respiratory triggers, and estimate the pooled pathogen-specific effects on acute myocardial infarction and stroke events.

## Objectives

Our objective is to systematically review the associations between acute myocardial infarction/stroke and laboratory-confirmed respiratory viral infection. This will be addressed through a comprehensive search of analytical epidemiological evidence in humans of any age or geographical region, specifically published studies that capture laboratory-confirmed respiratory viral infections and their effects on acute myocardial infarction or stroke outcomes. A secondary objective is to identify gaps in the literature, assess the certainty of the evidence, and recommend areas for future research.

## Methods

The systematic review has been registered with the International Prospective Register of Systematic Reviews (PROSPERO). Important protocol amendments will be explained, including the date and reason for the amendment, in the completed published review, in addition to the tracking in PROSPERO.

## Eligibility criteria

The eligibility criteria based on the Population, Intervention/Exposure, Comparison, Outcome, Study design, and Timeframe (PICOST) approach, with “intervention” replaced by “exposure”, are as follows:

**Population:** Studies involving human participants of any age in any country or region. All healthcare or community settings (e.g. hospital admission, emergency department, ambulance attendances, and primary care consultations) will be considered.

**Exposure:** Laboratory-confirmed respiratory viral infection. We will consider viruses that primarily cause illnesses affecting the nose, throat, mouth, and breathing passages, such as common cold or flu-like symptoms. Respiratory viruses include (but are not limited to): influenza, parainfluenza, RSV, human metapneumovirus, rhinovirus, adenovirus, and SARS-CoV-2. Bacteria (including mollicutes) or fungi are excluded. Studies will only be included in which the specific causative microorganism(s) are reported, as detected by confirmatory laboratory methods, including polymerase chain reaction (PCR) and serological tests, but exclude point-of-care testing such as rapid antigen tests. Suspected infection, influenza-like illness, or unspecified respiratory tract infections in the absence of laboratory-confirmed results, are excluded. We will exclude viruses that do not primarily result in respiratory phenotypes, such as human immunodeficiency virus (HIV), viral hepatitis, dengue virus, Ebola virus, and other viral haemorrhagic fevers. Latent or persistent viral exposure, such as human herpesviruses detected solely by serum IgG antibodies, will be excluded.

# **Comparator:**

Eligible studies must include a comparator group that is unexposed, that is, without respiratory infection, negative testing individuals, or non-active/latent infection. This includes individuals with negative laboratory test result(s), an infection-free group in cohort and case-control studies, or unexposed person-time in case-only studies. In randomised controlled trials (RCTs) testing specific anti-infective interventions, such as influenza vaccine studies, data will be treated observationally, that is, the comparator group will be considered regardless of treatment allocation. Before and after (pre–post) COVID-19 pandemic comparators are excluded to ensure all groups have similar chance of exposure to the circulating respiratory virus.



**Outcome:** Fatal and non-fatal incidence of AMI or stroke (ischaemic or haemorrhagic), either first or recurrent events. Studies will be included if both or one of these conditions is measured, that is, either AMI or stroke. Diagnosis may be clinical, routinely coded, or self-reported. Patients with composite acute cardiovascular or cerebrovascular outcomes, but not exclusively AMI or stroke, will be excluded. We will exclude transient ischaemic attacks and other neurological or thrombotic conditions in which AMI or stroke is not specifically mentioned, such as unstable angina, cardiac arrest, congestive heart failure or cardiomyopathy, peripheral arterial disease, or venous thromboembolism. Cardiovascular or cerebrovascular inflammatory conditions of infectious origin, such as myocarditis, encephalitis, meningitis, or endocarditis, will be excluded. RCTs capturing adverse events following vaccination and surgical or pharmacological complications will be excluded if AMI or stroke is not the primary outcome. Studies assessing only intermediate outcomes such as inflammatory biomarkers are also excluded.

**Study design:** Primary research papers describing RCTs, cohort and case-control studies, self-controlled case series, and case crossover designs. RCTs will be included where there are arm-specific data for the effect of infection for the effect of infection on the risk of incident AMI and/or stroke. Cross-sectional study designs, uncontrolled before-after studies including interrupted time series, ecological studies, case reports, or case series of individual patients, and reviews will be excluded. Studies must report the effect estimates (risk ratio, odds ratio, rate ratio, incidence rate ratio, or hazard ratio) or provide data to calculate an estimate of the effect on the risk of acute myocardial infarction and/or stroke.

**Timeframe:** While there are no time restrictions on the risk window or follow-up period used, we will prioritise studies using short-term risk periods (up to 90 days) of laboratory confirmation i.e. primary outcome occurring within the date of specimen collection. Studies

with longer risk periods will be assessed for eligibility considering the risk of bias for inclusion. This time window focuses on the cardiovascular triggering effect following viral infection. We will consider contacting corresponding authors to confirm eligibility or to obtain further information where needed.

No date, country, geographical, language, publication status or minimum sample size restrictions apply. Studies in which the methods are insufficiently described or without extractable results will be excluded. Refinement of the eligibility criteria is expected to be iterative and depends on the search results identified during screening. We will consider contacting authors for clarification or if further information is needed to confirm eligibility. This systematic review will be reported in accordance with the PRISMA guidelines and Meta-analysis of Observational Studies in Epidemiology (MOOSE) statement (if applicable).[24,25] Additionally, the current protocol adheres to the Preferred Reporting Items for Systematic Review Protocols (PRISMA-P) 2015 statement (see S1 File for checklist).[26]

## Information sources

We will search the following electronic bibliographic databases from their inception until the end of March 2024: MEDLINE (Ovid), Embase (Ovid), PubMed (NLM), Cochrane Central Register of Controlled Trials (Wiley), and Web of Science Core Collection (Clarivate Analytics). The database selection and search strategy were developed in close consultation with an experienced medical/healthcare librarian engaged in the early planning phase. In

addition, we will check the reference lists of the included studies (backward citations) and articles that cited the included studies (forward citations) to identify any further relevant papers. Where necessary, investigators will be contacted to request further information about conference abstracts, trial registrations, or unpublished work. A preliminary search of previous systematic reviews on the topic to identify existing or related reviews registered on PROSPERO and via the Cochrane Library has been conducted to avoid duplicating work. Articles cited in previous systematic reviews will be checked to identify any other potentially relevant studies.

## Search strategy

The search strategy combines thesaurus terms or Medical Subject Headings (MeSH), where available, and free-text synonyms for search concepts based on the PICOST framework (S2 File). A search strategy has been designed based on the Population, Exposure, Outcome and Study design elements using Boolean operators (AND, OR) to combine variations of the following search concepts: “Humans”, excluding animal studies; “Laboratory confirmatory tests”, including monoplex or multiplex PCR assays, serology, viral culture and immunofluorescence; “respiratory viruses” including influenza viruses, coronaviruses including SARS-CoV-2, picornaviruses (including enteroviruses), human metapneumovirus, RSV, paramyxoviruses (including parainfluenza viruses), adenoviruses, herpes family viruses (including herpes simplex virus 1 and 2, varicella zoster virus, Epstein-Barr virus and cytomegalovirus) and human bocavirus; “acute myocardial infarction or stroke” including heart attack, cardiovascular death, ischaemic stroke, haemorrhagic stroke; and from analytical epidemiological study designs. Where thesaurus terms or MeSH exist, for example, virus

families covering relevant species or subtypes, these have been exploded to include all narrower terms in the tree (if appropriate). The search is limited to RCTs, cohort, case-control, self-controlled case-series and case crossover designs, based on the MEDLINE search filters from BMJ Best Practice for RCTs and epidemiological study designs.[27]. The strategy has been developed initially for MEDLINE via the Ovid interface, then subsequently translated into appropriate search terms for the other databases. The Polyglot Search Translator tool was used to assist with translation across from MEDLINE into the Cochrane Library.[28]

## **Study records**

### **Data management**

Citations retrieved will be uploaded to Covidence, an online software system used to manage systematic reviews and promotes collaboration among authors.[29] Duplicates will be removed using the in-built duplicate feature, and further deduplication by manual review in Covidence. Upon completion of title and abstract screening, full-text articles will be uploaded to Covidence for full-text review. The reference management software EndNote X21 (Clarivate Analytics) will be used to manage records outside of Covidence throughout the review.[30]

### **Selection process**

The title/abstract screening process will initially be piloted with at least 50 articles to ensure consistent implementation of the eligibility criteria between reviewers. Following

deduplication, the search results will be screened for eligibility by two independent reviewers in two stages: title and abstract screening, followed by a review of the full text. Discrepancies in either of the screening stages will be resolved by consensus and/or arbitration by a third reviewer. Inter-rater reliability will be calculated using the Cohen  $\kappa$  value for both stages of screening. Studies determined to be ineligible will be excluded from the review and reasons for exclusion at the full-text stage reported in accordance with Preferred Reporting Items for Systematic reviews and Meta-analyses (PRISMA).[24] A PRISMA-compliant flow chart will be used to display the selection of articles with reasons for exclusion.

## **Data collection process**

Data will be extracted using a standardised template based on the PICOST framework using Covidence software. A standardised data collection form in Covidence will initially be piloted on at least 50 of the included studies, and changes to the form will be made if required. We will collect data on study populations, settings, exposure and outcome definitions, outcome measures, effect sizes, confidence intervals, and results of significance testing. The authors of the studies will be contacted if missing data are identified during the data extraction phase.

We will assess the need for double extraction of results if there is sufficient homogeneity for meta-analysis. If meta-analysis is required, we will use double data extraction (of critical data items required for the interpretation of results) performed independently by two people to minimise errors, and discrepancies will be resolved by discussion. Otherwise, data extraction will be performed by one reviewer and checked for accuracy by a second reviewer.

## 252    **Data items**

253    Data items on the following five domains will be extracted:

- 254    1. Study characteristics: author(s), publication, year, country, study design, funding source(s)
- 255    2. Population: characteristics of the study population (e.g., age, sex, country and setting,
- 256    inclusion and exclusion criteria), sample size, study period, follow-up time (if applicable)
- 257    3. Exposure: viral respiratory pathogen(s), definition of exposure(s), risk window used, type
- 258    of laboratory test used, number of exposed subjects
- 259    4. Comparators: definition of unexposed individuals, number of unexposed subjects,
- 260    confounders adjusted for
- 261    5. Outcomes: acute myocardial infarction and/or stroke, outcome definition and method of
- 262    diagnosis, disease subtype (if applicable), number of subjects with outcome, effective size,
- 263    95% confidence interval, p-value

264    For studies meeting the inclusion criteria, we will additionally assess mortality outcomes and

265    data among the specific cardiovascular endpoints: ST-elevation myocardial infarction

266    (STEMI) or non-STEMI, and ischaemic or haemorrhagic stroke, if available.

267

## 268    **Risk of bias in individual studies**

269    Study-level methodological quality assessment will examine the strength of the evidence

270    from individual studies regarding the presence and nature of potential triggering effect(s) of

respiratory virus exposure on acute cardiovascular outcomes. We will use the Cochrane Collaboration tools for randomised trials and non-randomised studies, the Cochrane Revised Risk of Bias tool for randomised trials (RoB 2) and the Cochrane Risk of Bias in Non-randomised studies – of Exposures (ROBINS-E) for observational studies to judge overall risk of bias for each individual study based on study methodology.[31] For RCTs, domains will include bias arising from 1) the randomisation process, 2) deviations from intended interventions, 3) missing outcome data, 4) measurement of the outcome and 5) selection of the reported result.[32] For non-randomised studies, the ROBINS-E tool for assessing epidemiological studies of exposure-outcome effects assesses seven domains for bias due to 1) confounding, 2) measurement of the exposure, 3) selection of participants into the study or analysis, 4) post-exposure interventions, 5) missing data, 6) measurement of the outcome and 7) selection of the reported result.[33]

The risk of bias assessment of the studies will be performed independently by two reviewers, and discrepancies will be resolved through discussion to achieve consensus. However, failing agreement, a third reviewer arbitrates. The overall risk of bias judgement will be categorised as ‘low risk of bias’, ‘some concerns’, or ‘high risk of bias’. The results will be synthesised into a narrative summary and incorporated into the primary analysis, stratified by outcome and subgroups, if appropriate. A summary table of domain-level judgments will be produced to show how each study fares.

## **Data synthesis and meta-bias(es)**

All syntheses will be categorised according to their primary outcome (acute myocardial infarction or stroke). Study characteristics and measured outcomes will be compiled into summary tables grouped by outcomes and specific viral pathogens. If the studies are sufficiently homogenous by outcome definition and population, we will combine the data statistically in a meta-analysis. A prerequisite is that the outcome definitions and relative effect measures need to match, and that at least three or more studies report the same outcome to trigger a meta-analysis.

For studies of the same primary dichotomous outcomes (acute myocardial infarction or stroke), a forest plot visualisation including confidence intervals, Cochrane's Q test for statistical heterogeneity, and  $I^2$  statistic will be used to assess between-study heterogeneity.[34] Where appropriate, meta-analysis will be conducted to calculate pooled effect sizes in a fixed-effect or random-effects model.

We will investigate sources of heterogeneity for each primary outcome by:

a) Sub-group analysis, and

b) Meta-regression, that is, meta-analyses for each subgroup (study design, outcome definition, studies with good/poor control for confounding, effects in older/younger individuals, etc.

Factors that may contribute to heterogeneity between studies evaluating the same outcome include: methodological diversity (study design, data source, or setting), study population characteristics (age strata, sex, country, socioeconomic status, and comorbidities), exposure definition (specific virus, laboratory test, or risk window), interventions (vaccinated or



unvaccinated), outcome definition (disease, subtype), and diagnosis (clinical diagnosis, administrative data, or self-report).

Where meta-analysis is not appropriate, only a qualitative synthesis is presented. Publication bias will be assessed using funnel plots. If sufficient data are available in the included studies, we will synthesise the answers to our research questions by subgroup. All analyses will be performed in R Statistical Software (v4.3.2 or later).[35]

## **Confidence in cumulative evidence**

The Grading of Recommendations, Assessment, Development and Evaluation (GRADE) approach will be used to assess the certainty of the evidence for each respiratory virus on each individual outcome, by patient population, across the five domains (Risk of bias, inconsistency, indirectness, imprecision and publication bias) for population-level outcomes.[36] The strength of the evidence will be categorised as ‘low’, ‘moderate’ or ‘high’, with observational studies starting as low-quality evidence, but upgraded to moderate or high quality in the presence of other factors that increase confidence in the result e.g. strong association, evidence of dose response gradient. Owing to the life-threatening, critical nature of our primary outcomes, we consider consistent nonzero relative effects (for example,  $RR > 1$ ) and precise estimates to be important. We will report the GRADE assessment in our results stratified by type of exposure with a row for each important outcome (myocardial infarction, stroke, or specific subtype), and the strength of the evidence will be presented in a ‘Summary of findings’ table. This assessment will enable formal judgement of the overall

quality of the evidence included in the review, summarising gaps in the literature, and areas for future research.

## **Ethics and dissemination**

This review is ongoing. As this is a systematic review, ethical approval is not required. Upon completion, the results will be submitted to a relevant journal for peer-reviewed publication, presented at scientific conferences in this field. A lay and short summary will be displayed in appropriate reports.

## **Conclusion**

Implementing cost-effective policies to avoid premature deaths, disability and unsustainable economic costs attributable to acute myocardial infarction and stroke are a global health priority.[37] There is currently indirect epidemiological evidence regarding the immediate triggering effects of influenza and other respiratory viruses, but the pooled pathogen-specific risk is unknown. Given the co-circulation of respiratory viruses and their increasing ability to prevent and mitigate symptomatic infections, it is important to quantify the relative effects of causative agents, particularly respiratory viruses, in order to evaluate the risk of cardiovascular outcomes. The findings of this systematic review offer value to clinicians as it will provide comprehensive evidence regarding common respiratory virus exposure and risk among high-risk patients. The findings will help to identify candidate pathogens for potential vaccine trials or other preventive therapies in targeted populations. Furthermore, where

attributable pathogens have established vaccines, this could be used for potential vaccine probe studies to inform vaccine-preventable cardiovascular burden.[38]

## Acknowledgements

The authors would like to thank Poh Chua (Librarian, Royal Children's Hospital Melbourne), whose advice and guidance were of integral importance in planning and designing the search process from the start of the protocol, and Lai-Yang Lee for providing technical expertise in interpreting latent viral diagnostics (Medical Microbiologist, Royal Children's Hospital Melbourne).

## References

1. Institute for Health Metrics and Evaluation (IHME). In: Global Burden of Disease (GBD) Compare [Internet]. GBD 2019 [cited 19 Sep 2023]. Available: <http://vizhub.healthdata.org/gbd-compare>
2. Roth GA, Mensah GA, Johnson CO, Addolorato G, Ammirati E, Baddour LM, et al. Global Burden of Cardiovascular Diseases and Risk Factors, 1990–2019. *J Am Coll Cardiol*. 2020;76: 2982–3021. doi:10.1016/j.jacc.2020.11.010
3. Yusuf S, Hawken S, Ôunpuu S, Dans T, Avezum A, Lanas F, et al. Effect of potentially modifiable risk factors associated with myocardial infarction in 52 countries (the INTERHEART study): case-control study. *The Lancet*. 2004;364: 937–952. doi:10.1016/S0140-6736(04)17018-9
4. O'Donnell MJ, Chin SL, Rangarajan S, Xavier D, Liu L, Zhang H, et al. Global and regional effects of potentially modifiable risk factors associated with acute stroke in 32 countries (INTERSTROKE): a case-control study. *The Lancet*. 2016;388: 761–775. doi:10.1016/S0140-6736(16)30506-2

- 380 5. Schwartz BG, Mayeda GS, Burstein S, Economides C, Kloner RA. When and Why Do  
381 Heart Attacks Occur? Cardiovascular Triggers and Their Potential Role. *Hosp Pract*.  
382 2010;38: 144–152. doi:10.3810/hp.2010.06.308
- 383 6. Smeeth L, Thomas SL, Hall AJ, Hubbard R, Farrington P, Vallance P. Risk of  
384 Myocardial Infarction and Stroke after Acute Infection or Vaccination. *N Engl J Med*.  
385 2004;351: 2611–2618. doi:10.1056/NEJMoa041747
- 386 7. Blackburn R, Zhao H, Pebody R, Hayward A, Warren-Gash C. Laboratory-Confirmed  
387 Respiratory Infections as Predictors of Hospital Admission for Myocardial Infarction  
388 and Stroke: Time-Series Analysis of English Data for 2004–2015. *Clin Infect Dis*.  
389 2018;67: 8–17. doi:10.1093/cid/cix1144
- 390 8. Omid F, Zangiabadian M, Shahidi Bonjar AH, Nasiri MJ, Sarmastzadeh T. Influenza  
391 vaccination and major cardiovascular risk: a systematic review and meta-analysis of  
392 clinical trials studies. *Sci Rep*. 2023;13: 20235. doi:10.1038/s41598-023-47690-9
- 393 9. Kwong JC, Schwartz KL, Campitelli MA, Chung H, Crowcroft NS, Karnauchow T, et  
394 al. Acute Myocardial Infarction after Laboratory-Confirmed Influenza Infection. *N Engl*  
395 *J Med*. 2018;378: 345–353. doi:10.1056/NEJMoa1702090
- 396 10. Pagliano P, Spera AM, Ascione T, Esposito S. Infections causing stroke or stroke-like  
397 syndromes. *Infection*. 2020;48: 323–332. doi:10.1007/s15010-020-01415-6
- 398 11. Ivey KS, Edwards KM, Talbot HK. Respiratory Syncytial Virus and Associations With  
399 Cardiovascular Disease in Adults. *J Am Coll Cardiol*. 2018;71: 1574–1583.  
400 doi:10.1016/j.jacc.2018.02.013
- 401 12. Ridker PM, Hennekens CH, Stampfer MJ, Wang F. Prospective Study of Herpes  
402 Simplex Virus, Cytomegalovirus, and the Risk of Future Myocardial Infarction and  
403 Stroke. *Circulation*. 1998;98: 2796–2799. doi:10.1161/01.CIR.98.25.2796
- 404 13. Xie Y, Xu E, Bowe B, Al-Aly Z. Long-term cardiovascular outcomes of COVID-19.  
405 *Nat Med*. 2022;28: 583–590. doi:10.1038/s41591-022-01689-3
- 406 14. Gopal R, Marinelli MA, Alcorn JF. Immune Mechanisms in Cardiovascular Diseases  
407 Associated With Viral Infection. *Front Immunol*. 2020;11: 570681.  
408 doi:10.3389/fimmu.2020.570681
- 409 15. Warren-Gash C, Smeeth L, Hayward AC. Influenza as a trigger for acute myocardial  
410 infarction or death from cardiovascular disease: a systematic review. *Lancet Infect Dis*.  
411 2009;9: 601–610. doi:10.1016/S1473-3099(09)70233-6
- 412 16. Blackburn R, Zhao H, Pebody R, Hayward A, Warren-Gash C. Laboratory-Confirmed  
413 Respiratory Infections as Predictors of Hospital Admission for Myocardial Infarction  
414 and Stroke: Time-Series Analysis of English Data for 2004–2015. *Clin Infect Dis*.  
415 2018;67: 8–17. doi:10.1093/cid/cix1144

17. Ohland J, Warren-Gash C, Blackburn R, Mølbak K, Valentiner-Branth P, Nielsen J, et al. Acute myocardial infarctions and stroke triggered by laboratory-confirmed respiratory infections in Denmark, 2010 to 2016. *Eurosurveillance*. 2020;25. doi:10.2807/1560-7917.ES.2020.25.17.1900199
18. Clar C, Oseni Z, Flowers N, Keshtkar-Jahromi M, Rees K. Influenza vaccines for preventing cardiovascular disease. Cochrane Heart Group, editor. *Cochrane Database Syst Rev*. 2015;2015. doi:10.1002/14651858.CD005050.pub3
19. Fountoulaki K, Tsiodras S, Polyzogopoulou E, Olympios C, Parissis J. Beneficial Effects of Vaccination on Cardiovascular Events: Myocardial Infarction, Stroke, Heart Failure. *Cardiol Int J Cardiovasc Med Surg Pathol Pharmacol*. 2018;141: 98–106. doi:10.1159/000493572
20. Warren-Gash C, Smeeth L, Hayward AC. Influenza as a trigger for acute myocardial infarction or death from cardiovascular disease: a systematic review. *Lancet Infect Dis*. 2009;9: 601–610. doi:10.1016/S1473-3099(09)70233-6
21. Pellicori P, Doolub G, Wong CM, Lee KS, Mangion K, Ahmad M, et al. COVID-19 and its cardiovascular effects: a systematic review of prevalence studies. *Cochrane Database Syst Rev*. 2021;2022. doi:10.1002/14651858.CD013879
22. La Roi-Teeuw HM, Van Smeden M, Bos M, De Wilde SM, Yang B, Rutten FH, et al. Estimated causal effects of common respiratory infections on cardiovascular risk: a meta-analysis. *Open Heart*. 2023;10: e002501. doi:10.1136/openhrt-2023-002501
23. Davidson JA, Banerjee A, Douglas I, Leyrat C, Pebody R, McDonald HI, et al. Primary prevention of acute cardiovascular events by influenza vaccination: an observational study. *Eur Heart J*. 2023;44: 610–620. doi:10.1093/eurheartj/ehac737
24. Page MJ, McKenzie JE, Bossuyt PM, Boutron I, Hoffmann TC, Mulrow CD, et al. The PRISMA 2020 statement: an updated guideline for reporting systematic reviews. *BMJ*. 2021; n71. doi:10.1136/bmj.n71
25. Stroup DF, Berlin JA. Meta-analysis of Observational Studies in Epidemiology: A Proposal for Reporting. Meta-analysis of Observational Studies in Epidemiology (MOOSE) group. *JAMA*. 2000;283: 2008. doi:10.1001/jama.283.15.2008
26. PRISMA-P Group, Moher D, Shamseer L, Clarke M, Ghera D, Liberati A, et al. Preferred reporting items for systematic review and meta-analysis protocols (PRISMA-P) 2015 statement. *Syst Rev*. 2015;4: 1. doi:10.1186/2046-4053-4-1
27. British Medical Journal (BMJ) Knowledge Centre. Search strategies. In: *BMJ Best Practice* [Internet]. 2023 [cited 29 Dec 2023]. Available: <https://bestpractice.bmj.com/info/toolkit/learn-ebm/study-design-search-filters/>
28. Clark JM, Sanders S, Carter M, Honeyman D, Cleo G, Auld Y, et al. Improving the translation of search strategies using the Polyglot Search Translator: a randomized controlled trial. *J Med Libr Assoc*. 2020;108. doi:10.5195/jmla.2020.834

29. Covidence. Melbourne, Australia: Veritas Health Innovation; 2024. Available: [www.covidence.org](http://www.covidence.org)
30. The EndNote Team. EndNote. Philadelphia, PA: Clarivate; 2024.
31. Higgins JPT, Thomas J, Chandler J, Cumpston M, Li T, Page MJ, et al., editors. Cochrane Handbook for Systematic Reviews of Interventions. version 6.4. Hoboken, NJ: Wiley-Blackwell; 2023. Available: <https://training.cochrane.org/handbook>
32. Sterne JAC, Savović J, Page MJ, Elbers RG, Blencowe NS, Boutron I, et al. RoB 2: a revised tool for assessing risk of bias in randomised trials. BMJ. 2019; 14898. doi:10.1136/bmj.14898
33. ROBINS-E Development Group (Higgins J, Morgan R, Rooney A, Taylor K, Thayer K, Silva R, Lemeris C, Akl A, Arroyave W, Bateson T, Berkman N, Demers P, Forastiere F, Glenn B, Hróbjartsson A, Kirrane E, LaKind J, Luben T, Lunn R, McAleenan A, McGuinness L, Meerpohl J, Mehta S, Nachman R, Obbagy J, O'Connor A, Radke E, Savović J, Schubauer-Berigan M, Schwingl P, Schunemann H, Shea B, Steenland K, Stewart T, Straif K, Tilling K, Verbeek V, Vermeulen R, Viswanathan M, Zahm S, Sterne J). Risk Of Bias In Non-randomized Studies - of Exposure (ROBINS-E). 2023. Available: <https://www.riskofbias.info/welcome/robins-e-tool>
34. Higgins JPT. Measuring inconsistency in meta-analyses. BMJ. 2003;327: 557–560. doi:10.1136/bmj.327.7414.557
35. R Core Team. R: A Language and Environment for Statistical Computing. Vienna, Austria: R Foundation for Statistical Computing; 2021. Available: <https://www.R-project.org/>
36. Guyatt G, Oxman AD, Akl EA, Kunz R, Vist G, Brozek J, et al. GRADE guidelines: 1. Introduction—GRADE evidence profiles and summary of findings tables. J Clin Epidemiol. 2011;64: 383–394. doi:10.1016/j.jclinepi.2010.04.026
37. UN DESA. The Sustainable Development Goals Report 2023: Special Edition - July 2023. New York, USA: UN DESA; 2023. Available: <https://unstats.un.org/sdgs/report/2023/>
38. Feikin DR, Scott JAG, Gessner BD. Use of vaccines as probes to define disease burden. The Lancet. 2014;383: 1762–1770. doi:10.1016/S0140-6736(13)61682-7

## 485    **Supporting information**

- 486    **S1 File. PRISMA-P checklist.** Preferred Reporting Items for Systematic review and Meta-  
 487    analysis Protocols (PRISMA-P) checklist
- 488    **S2 File. Search strategy.** Search strategy for Ovid MEDLINE, Ovid Embase, PubMed,  
 489    Cochrane Central Register of Controlled Trials (CENTRAL), and Web of Science
